# Supplementary material for: PAMAM/5-fluorouracil drug conjugate for targeting E6 and E7 oncoproteins in cervical cancer: a combined experimental/in silico approach
Source: Royal Society of Chemistry journal article supplement (doi:10.1039/c6ra26511a), 2017-01-01
Supplement: c6ra26511a1.pdf [file c6ra26511a1.pdf]

## Supporting information

### **PAMAM/5-fluorouracil drug conjugate for targeting E6 and E7 oncoproteins in cervical cancer: a combined experimental/in silico approach†**

**Arunkumar Rengaraj,<sup>a†</sup> Subbiah Balaji,<sup>b†</sup> Yuvaraj Haldorai,<sup>c</sup> Dhanusha Yesudhas,<sup>d</sup> Hyung Joong Yun,<sup>e</sup> Soonjo Kwon,<sup>f</sup> Sangdun Choi,<sup>d</sup> Young-Kyu Han,<sup>c</sup> Eung-Soo Kim<sup>a</sup>, N. Hema Shenpagam<sup>b\*</sup> and Yun Suk Huh<sup>a\*</sup>**

*<sup>a</sup>Department of Biological Engineering, Biohybrid Systems Research Center (BSRC), Inha University, Incheon, 22212, Republic of Korea.*

*<sup>b</sup>PG & Research Department of Microbiology, Hindustan College of Arts and Science, Coimbatore, 641028, India.*

*<sup>c</sup>Department of Energy and Materials Engineering, Dongguk University, Seoul, 100-715, Republic of Korea.*

*<sup>d</sup>Department of Molecular Science and Technology, Ajou University, Suwon, 443-749, Republic of Korea.*

*<sup>e</sup>Advanced Nano Surface Research Group, Korea Basic Science Institute(KBSI).*

*<sup>f</sup>Department of Biological Engineering, Integrated Tissue Engineering, Inha University, Incheon, 22212, Republic of Korea.*

† -These authors contributed equally to this work.

Fax: +82-32-872-4046; Email:yunsuk.huh@inha.ac.kr

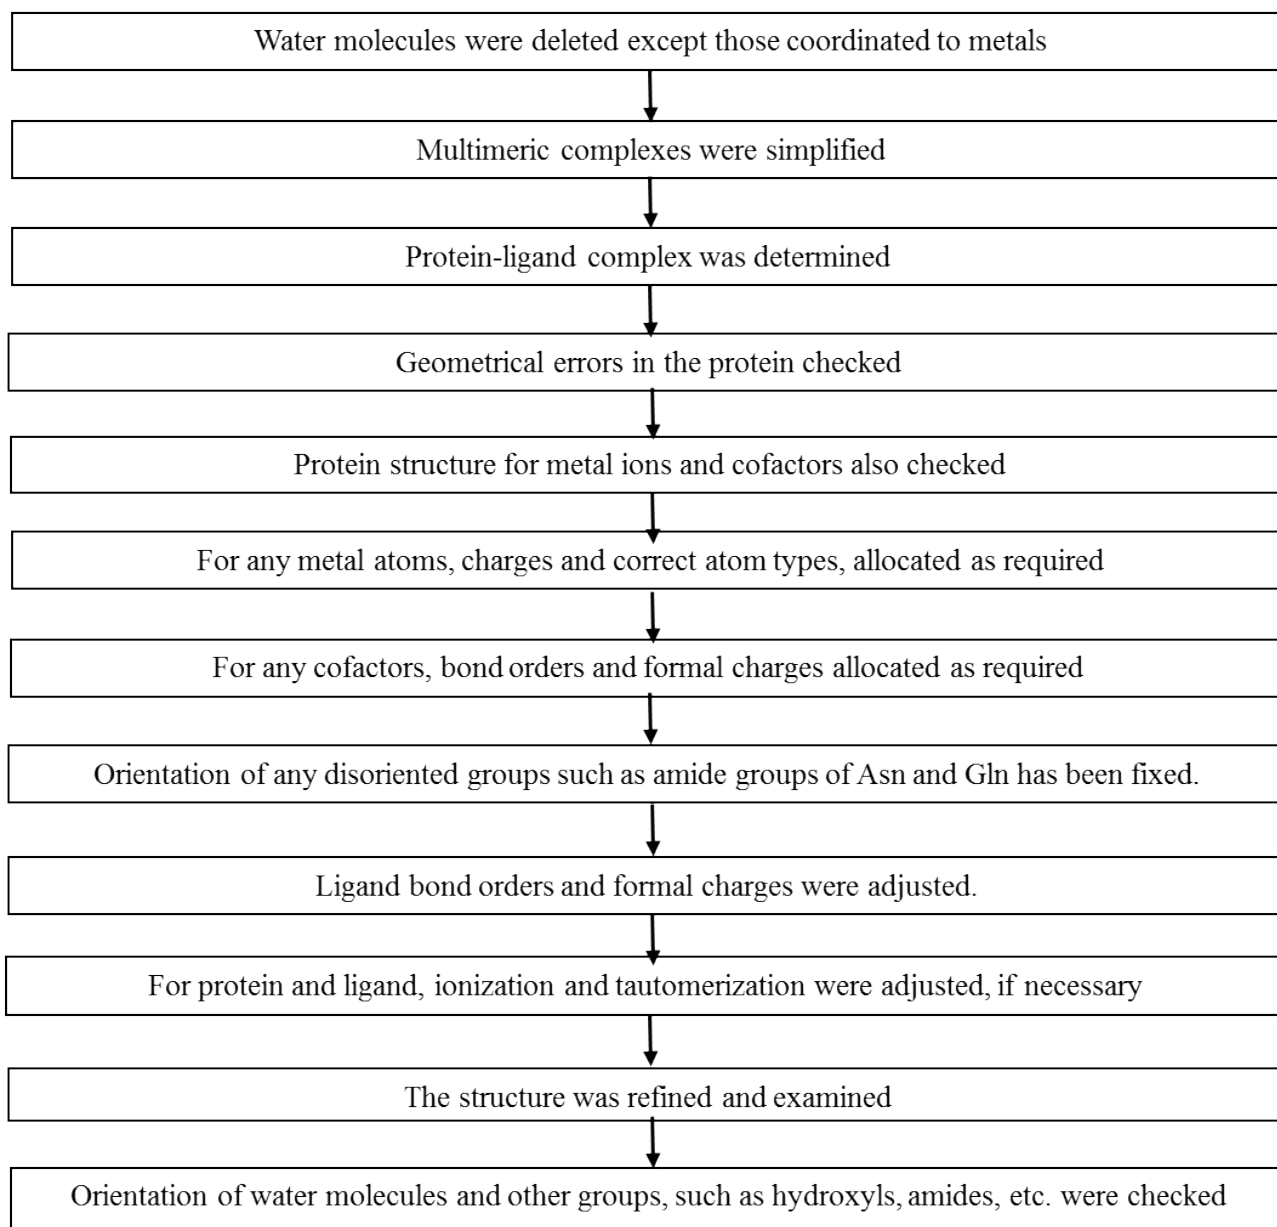

**Protocol 1. Protein preparation- Schrödinger suite.**

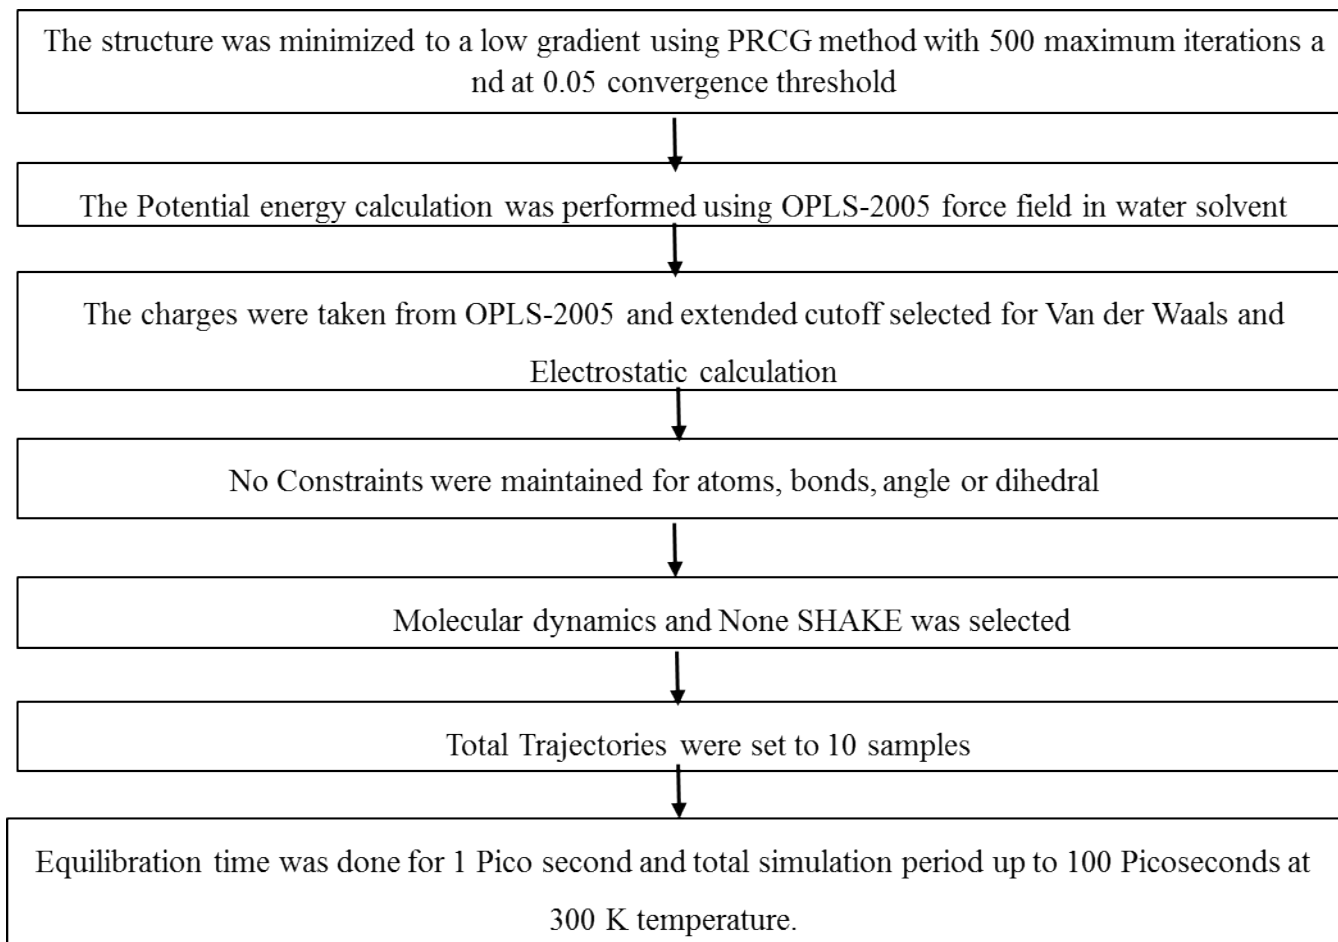

**Protocol 2. Methodology and parameters for molecular simulation of E6 and E7 oncoproteins and oncoprotein-5-FU complex.**

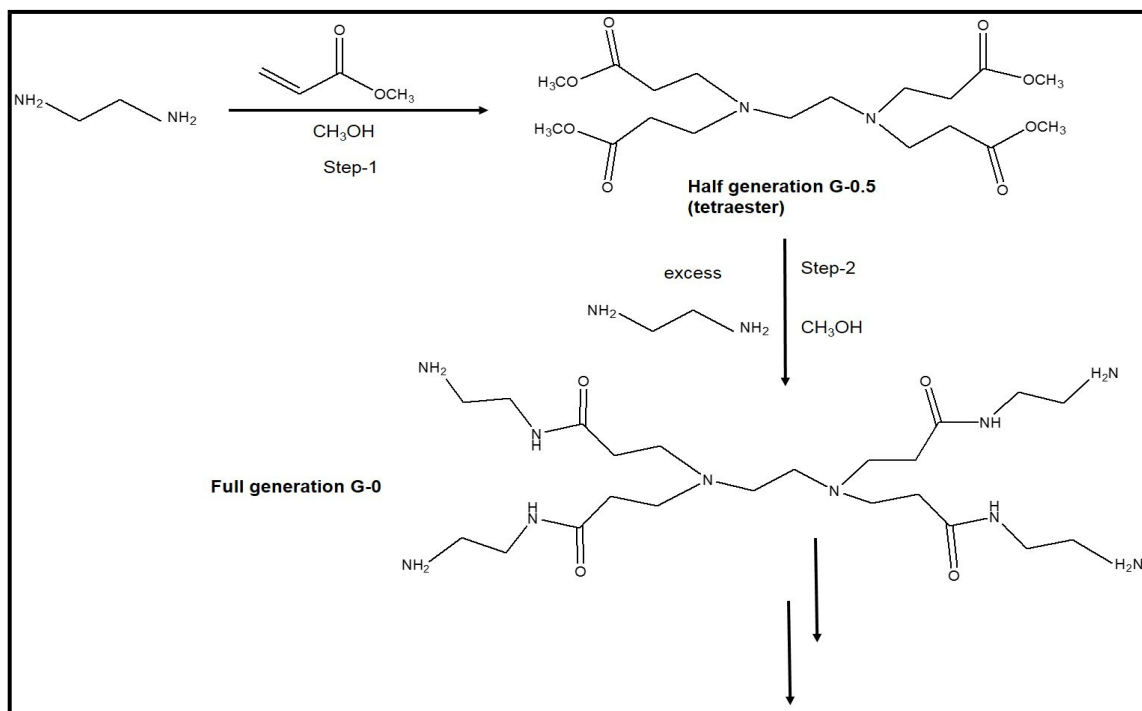

**Scheme S1. Diagram of the synthesis of EDA-core PAMAM dendrimers.**

**Table S1. Synthesis of different generations of PAMAM using EDA and methyl acrylate**

| S. No | Dendrimer generations | 0.01M PAMAM dendrimer |                      |
|-------|-----------------------|-----------------------|----------------------|
|       |                       | Ethylene diamine (mL) | Methyl Acrylate (mL) |
| 1     | 0.5G                  | 0.67                  | 7.21                 |
| 2     | 1.0G                  | 5.36                  | -                    |
| 3     | 1.5G                  | -                     | 14.42                |
| 4     | 2.0G                  | 10.71                 | -                    |
| 5     | 2.5G                  | -                     | 28.85                |

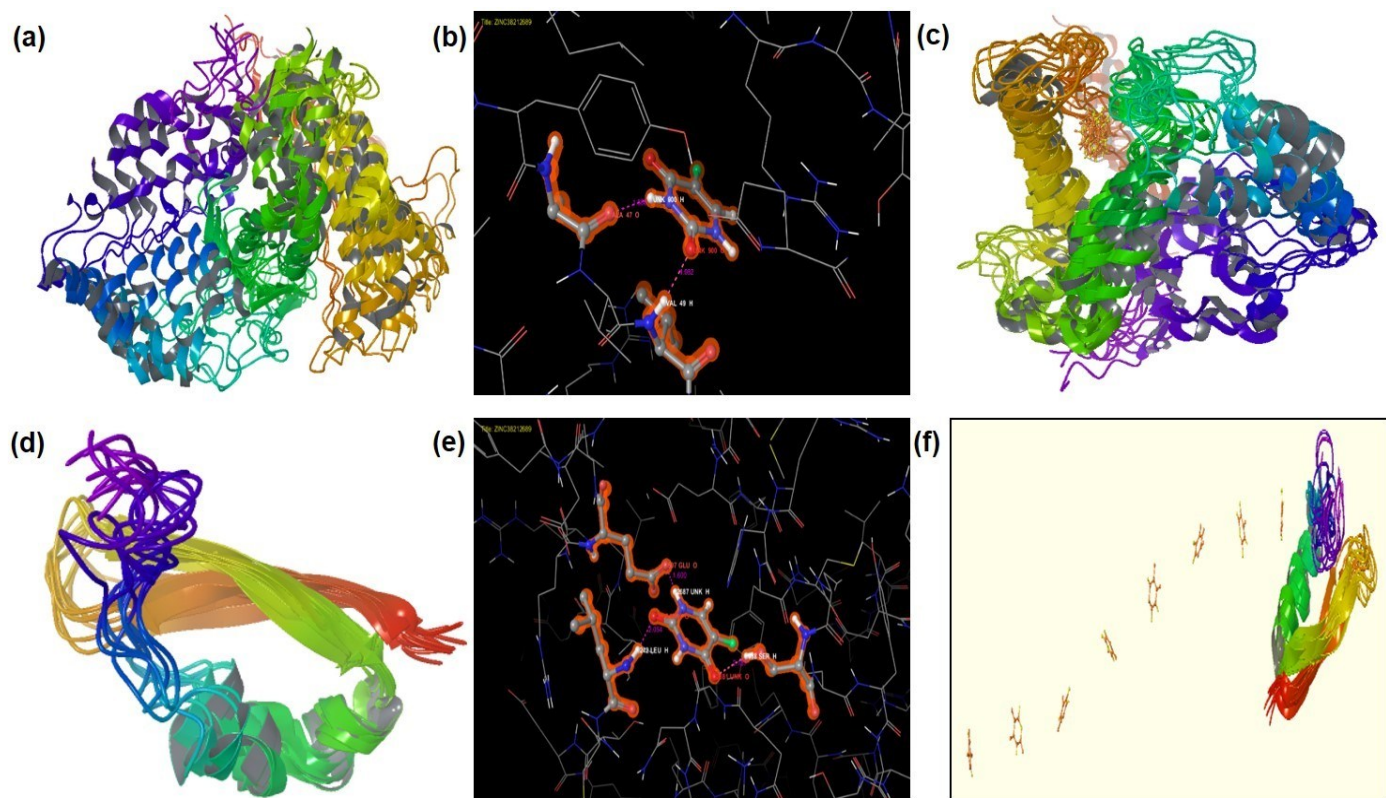

**Fig. S1. Molecular docking analysis. (a, d) conformational structure (b, e) interaction profile, and (c, f) RMSD plot of E6 and E7 protein over 5-FU.**

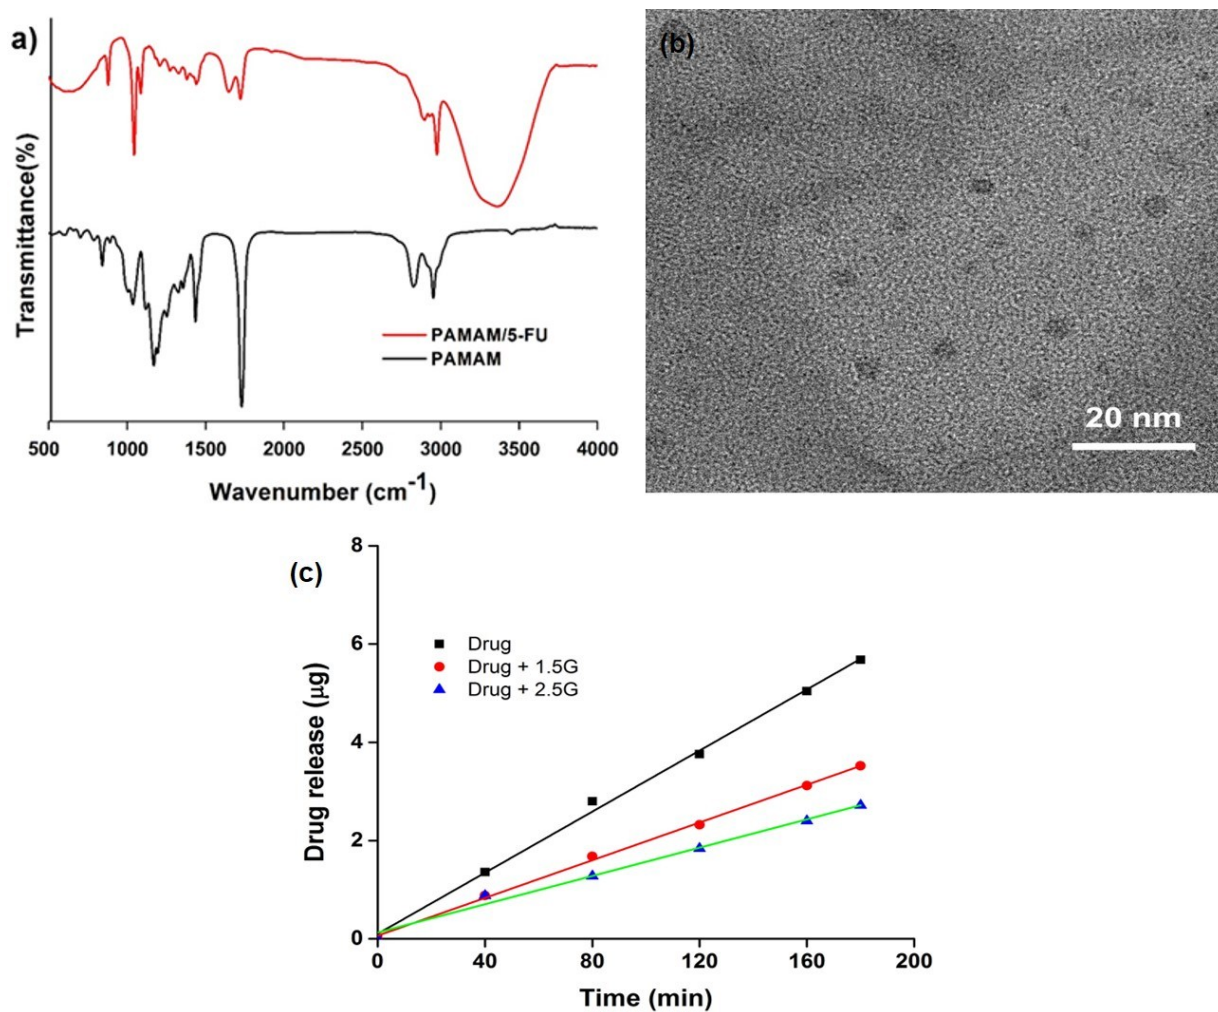

**Fig. S2 (a) FTIR spectrum and (b) TEM image of the PAMAM/5-FU complex and (d) Amount of Drug release at different time interval.**

**Table S2. FTIR bands of PAMAM and PAMAM/5-FU and their corresponding stretching vibrations**

| S. No | 1.5G PAMAM            | 1.5G PAMAM/5-FU       | Spectral assignment                   |
|-------|-----------------------|-----------------------|---------------------------------------|
| 1     | 3451 cm <sup>-1</sup> | 3366 cm <sup>-1</sup> | NH stretching                         |
| 2     | 2954 cm <sup>-1</sup> | 2972 cm <sup>-1</sup> | CH <sub>2</sub> Asymmetric stretching |
| 3     | 2827 cm <sup>-1</sup> | 2891 cm <sup>-1</sup> | CH <sub>2</sub> Symmetric stretching  |
| 4     | 1645 cm <sup>-1</sup> | 1643 cm <sup>-1</sup> | C=O stretching                        |
| 5     | 1257 cm <sup>-1</sup> | 1275 cm <sup>-1</sup> | C-N stretching                        |
| 6     | 1437 cm <sup>-1</sup> | 1442 cm <sup>-1</sup> | CH <sub>2</sub> bending               |
| 7     | -                     | 1088 cm <sup>-1</sup> | C-F stretching                        |



**Table S3. Dynamic light scattering analysis of PAMAM and PAMAM/5-FU**

| S. No | Sample       | PAMAM (nm) | PAMAM/5-FU width (nm) |
|-------|--------------|------------|-----------------------|
| 1     | 1.5G (0.01M) | 2.3        | 4.2                   |
| 2     | 2.5G (0.01M) | 5.6        | 6.9                   |

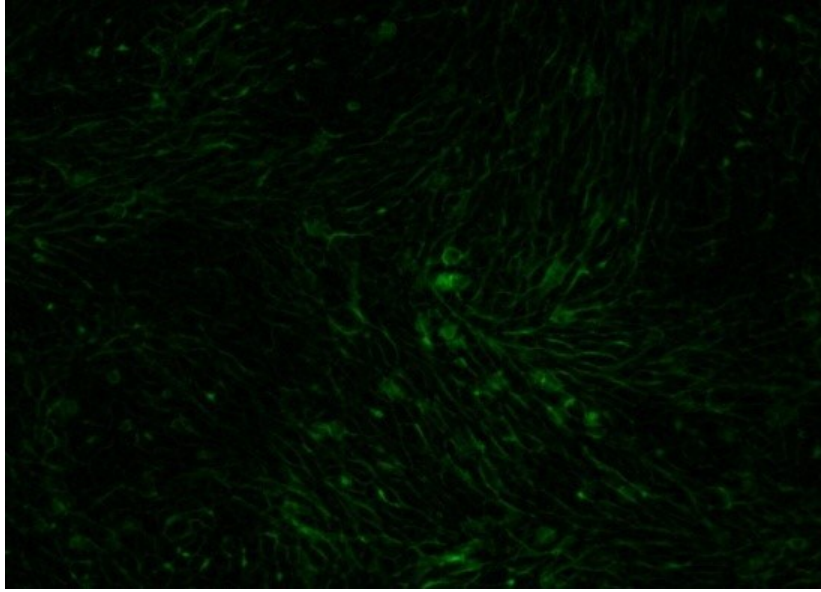

**Fig. S3. FITC-Drug conjugate.**

Group-I



**RIGIN**  
laboratory

10, PLS Nagar, Phase - II B,  
Chinniyam Palayam (po),  
Coimbatore - 641062  
Mobile : +91 81440 21144 , +91 78715 61  
Email : lab.origin@gmail.com

---

**CLINICAL PATHOLOGY**

SAMPLE NO: 1      SAMPLE DATE & TIME: 17.12.2013/10:00  
 REF. BY: KMCH COLLEGE OF PHARMACY, CBE      REPORT DATE & TIME: 18.12.2013/10:00  
 TESTS ASKED: HAEMATOLOGY(CBC)      SPECIMEN TYPE : EDTA BLOOD

| TEST NAME                        | RESULT                    | METHOD                    |
|----------------------------------|---------------------------|---------------------------|
| <b>COMPLETE BLOOD CELL COUNT</b> |                           |                           |
| Total Haemoglobin (Hb)           | 14.2 g/dl                 | Blood Cell Counter CD1700 |
| Packed Cell Volume (PCV)         | 46.2 %                    | - do-                     |
| Total WBC Count                  | 5.8 ×10 <sup>3</sup> /μL  | - do-                     |
| <b>DIFFERENTIAL COUNT</b>        |                           |                           |
| Polymorphs                       | 11 %                      | Blood Cell Counter CD1700 |
| Lymphocytes                      | 84 %                      | - do-                     |
| Monocytes                        | 05 %                      | - do-                     |
| Eosinophils                      | 00 %                      | - do-                     |
| Total RBC Count                  | 6.89 ×10 <sup>6</sup> /μL | - do-                     |
| MCV                              | 67.0 fL                   | - do-                     |
| MCH                              | 20.6 pg                   | - do-                     |
| MCHC                             | 30.7 g/dL                 | - do-                     |
| RDW                              | 24.2 %                    | - do-                     |
| Platelet Count                   | 916 ×10 <sup>3</sup> /μL  | - do-                     |
| MPV                              | 7.5 fL                    | - do-                     |

*Note: Please correlate with clinical conditions*  
*Explanation: RDW - Red cell distribution width; MPV - Mean platelet volume*

--- END OF REPORT ---



Checked



Lab Technician

**Fig. S4. Hematological analysis of Group-I BALB/c female mice with cervical cancer model.**
